# Supplementary material for: Planar Mechanical Metamaterials with Embedded Permanent Magnets
Source: MDPI journal article supplement (doi:10.3390/ma13061313), 2020-03-13
Supplement: s1 [file s1]

# Supplementary materials for “3D printed Mechanical Metamaterials with Embedded Permanent Magnets”

Viacheslav Slesarenko <sup>1,2,\*</sup>

<sup>1</sup> Freiburg Institute for Advanced Studies, Freiburg im Breisgau, Germany 79104

<sup>2</sup> Cluster of Excellence *livMatS* @ FIT – Freiburg Center for Interactive Materials and Bioinspired Technologies, University of Freiburg, Freiburg im Breisgau, Germany 79110

\* Correspondence: [sl.slesarenko@gmail.com](mailto:sl.slesarenko@gmail.com) or [viacheslav.slesarenko@frias.uni-freiburg.de](mailto:viacheslav.slesarenko@frias.uni-freiburg.de)

These two videos demonstrate the equibiaxial compression of the 3D printed mechanical metamaterial with embedded magnets in the attractive configuration. Video 1 corresponds to the arrangement II from the main manuscript, for which the return to the initial stable state occurs after unloading. Video 2 corresponds to the arrangement I, for which a snap-through phenomenon is observed. Both videos are sped up by x20.
